# Supplementary material
Source: PubMed Central journal article supplement (PMC5113144)
Supplement: NIHMS816147-supplement-1.pdf [file NIHMS816147-supplement-1.pdf]

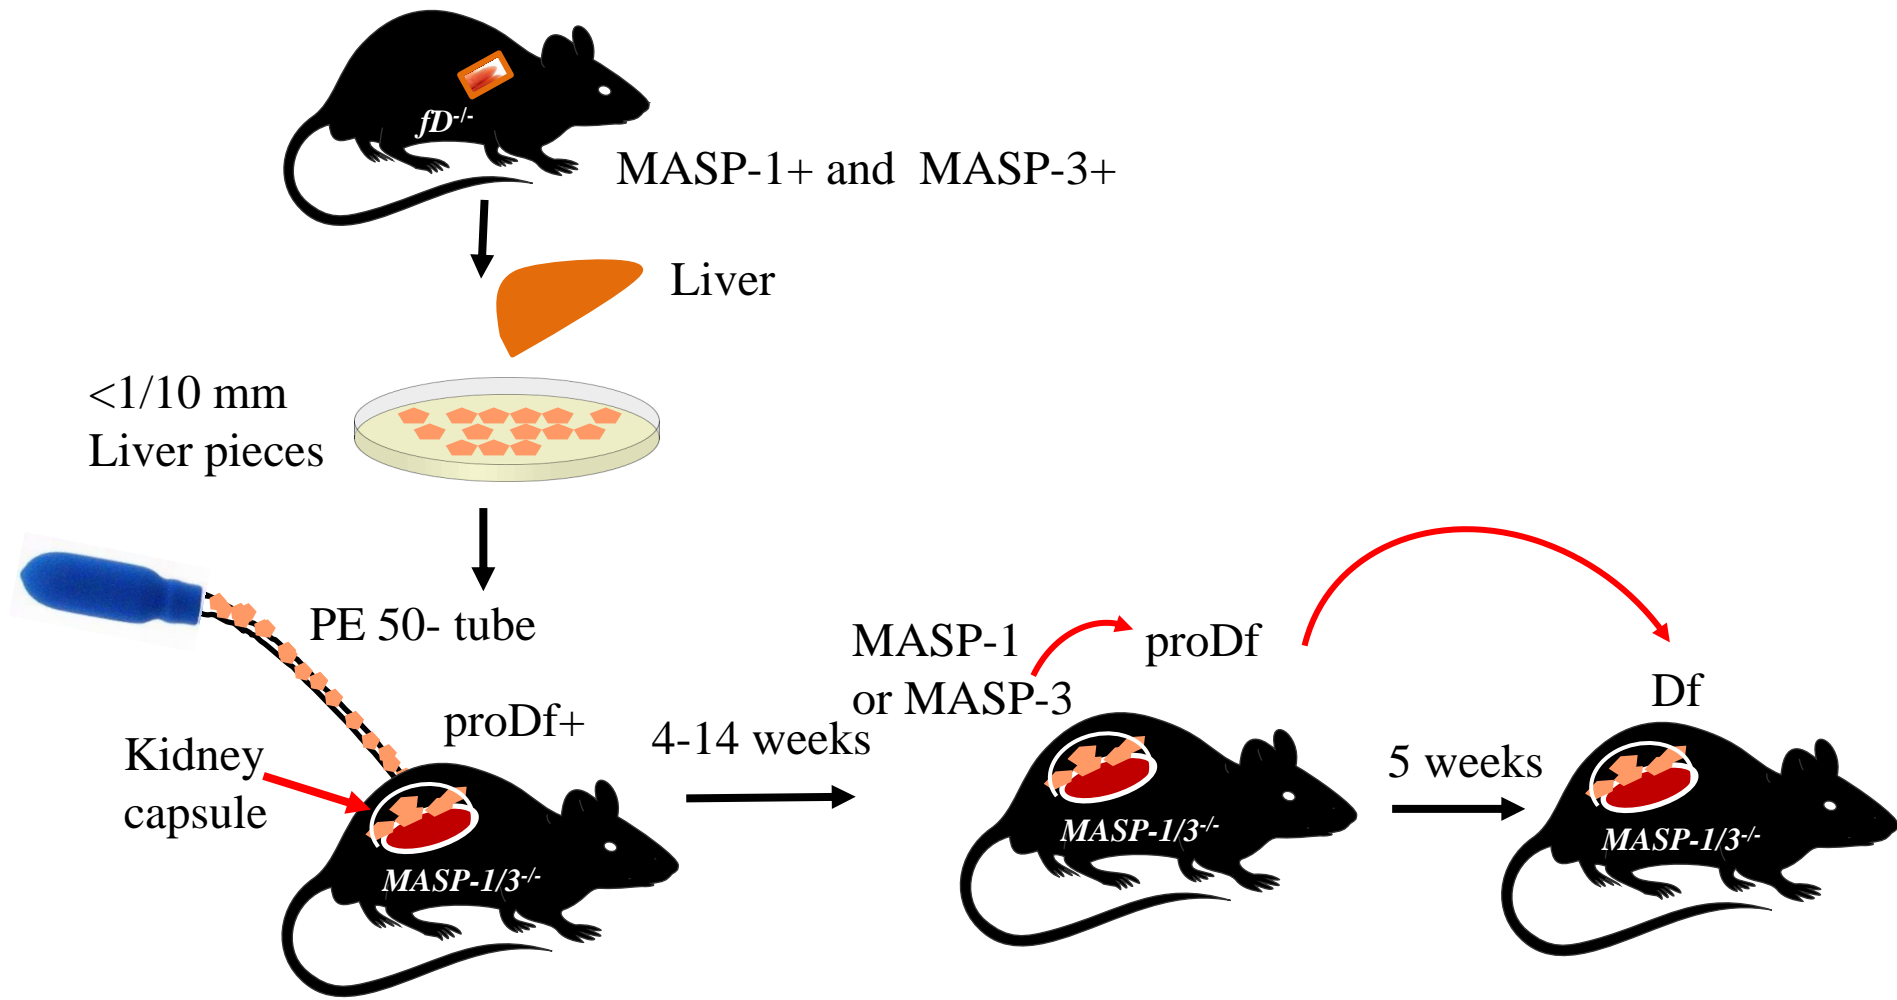

**Supplement Figure 1** liver transplantation schematic representation under the kidney capsule of C57Bl/6 mice. Liver from  $Df^{-/-}$  mice was chopped into small pieces (<1/10 mm) followed by transplantation under the left kidney capsule of  $MASP-1/3^{-/-}$  mice using PE-50 tube. Mice with transplanted liver were allowed to reconstitute for 5-14 weeks. Right kidney with no liver transplant was used as a negative control for histopathology examination. After 5-weeks blood was drawn and then mice were sacrificed and both kidneys were removed. Kidneys were fixed in a 10% neutral formalin buffer and tissue sections were stained using Eosin and Hematoxylin to examine the structure of liver and kidney.

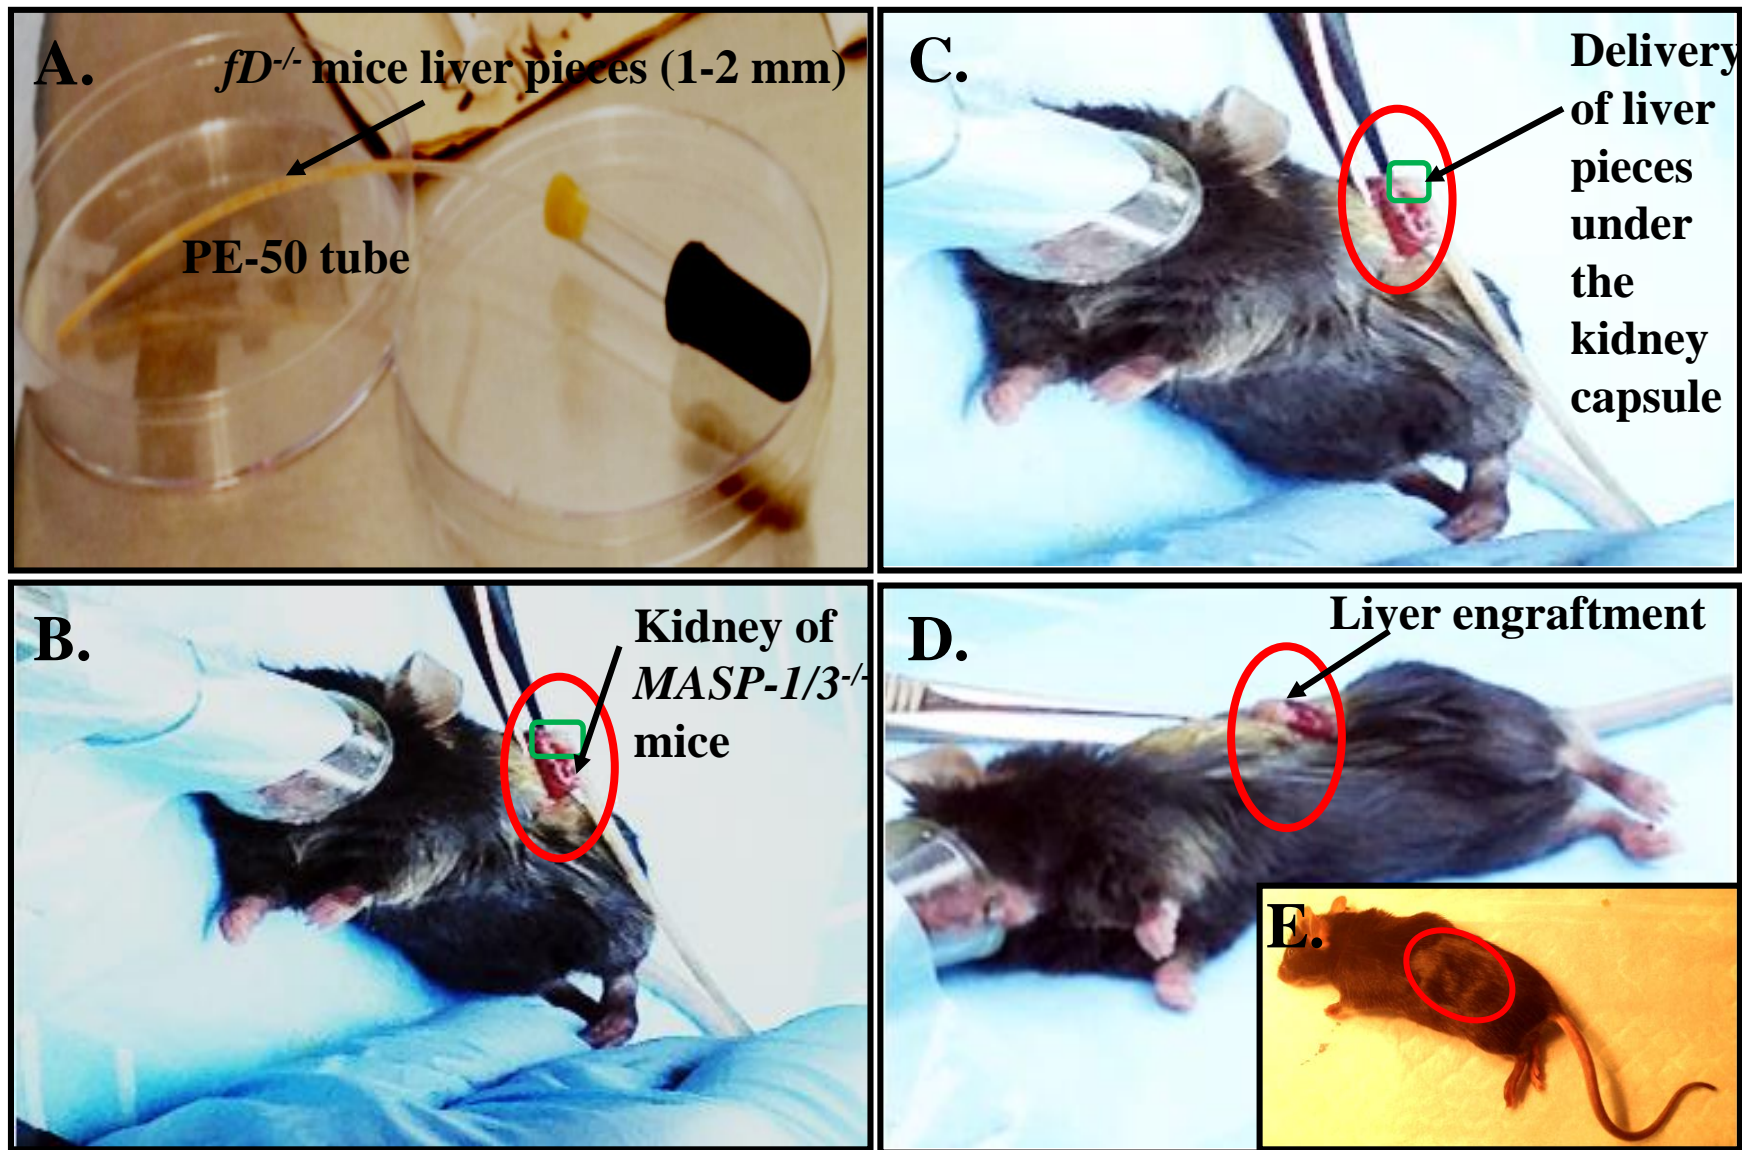

**Supplement Figure 2** Pictures showing liver transplantation under the kidney capsule of C57Bl/6 mice. All transplantation procedures were performed while *MASP-1/3*<sup>-/-</sup> mice were under anesthesia. **A.** Liver pieces from *fd*<sup>-/-</sup> mouse were dissected into small pieces and loaded into the PE-tube. **B.** A small cut was made on the skin and through the peritoneum after removing hair followed by the exposure of kidney. **C.** Again a small cut was made on the kidney capsule followed by insertion of the PE-50 tube to release liver pieces. **D.** liver pieces were spread around with a sterile glass rod followed by clamping of skin. **E.** All clamps were removed at day 10.
